# Supplementary material for: New emerging radially aligned carbon nano tubes comprised carbon hollow cylinder as an excellent absorber for electromagnetic environmental pollution
Source: Royal Society of Chemistry journal article supplement (doi:10.1039/c6tc00809g), 2016-01-01
Supplement: c6tc00809g1.pdf [file c6tc00809g1.pdf]

## †Supporting Information

New emerging radially aligned carbon nano tubes comprised carbon hollow cylinder as an excellent absorber for electromagnetic environmental pollution†

Ch. Ravi Prakash Patel<sup>‡,a</sup>, Prashant Tripathi<sup>‡,a</sup>, Sweta Singh<sup>a</sup>, Avanish Pratap Singh<sup>b</sup>, S. K. Dhawan<sup>b</sup>, R. K. Kotnala<sup>b</sup>, Bipin Kumar Gupta<sup>b</sup> and O. N. Srivastava<sup>\*a</sup>

<sup>a</sup>Nanoscience Centre, Department of Physics (Centre of Advanced Studies), Banaras Hindu University, Varanasi- 221005, India

<sup>b</sup>CSIR- National Physical Laboratory, New Delhi-110012, India

\*Email address: [heponsphy@gmail.com](mailto:heponsphy@gmail.com) (O. N. Srivastava)

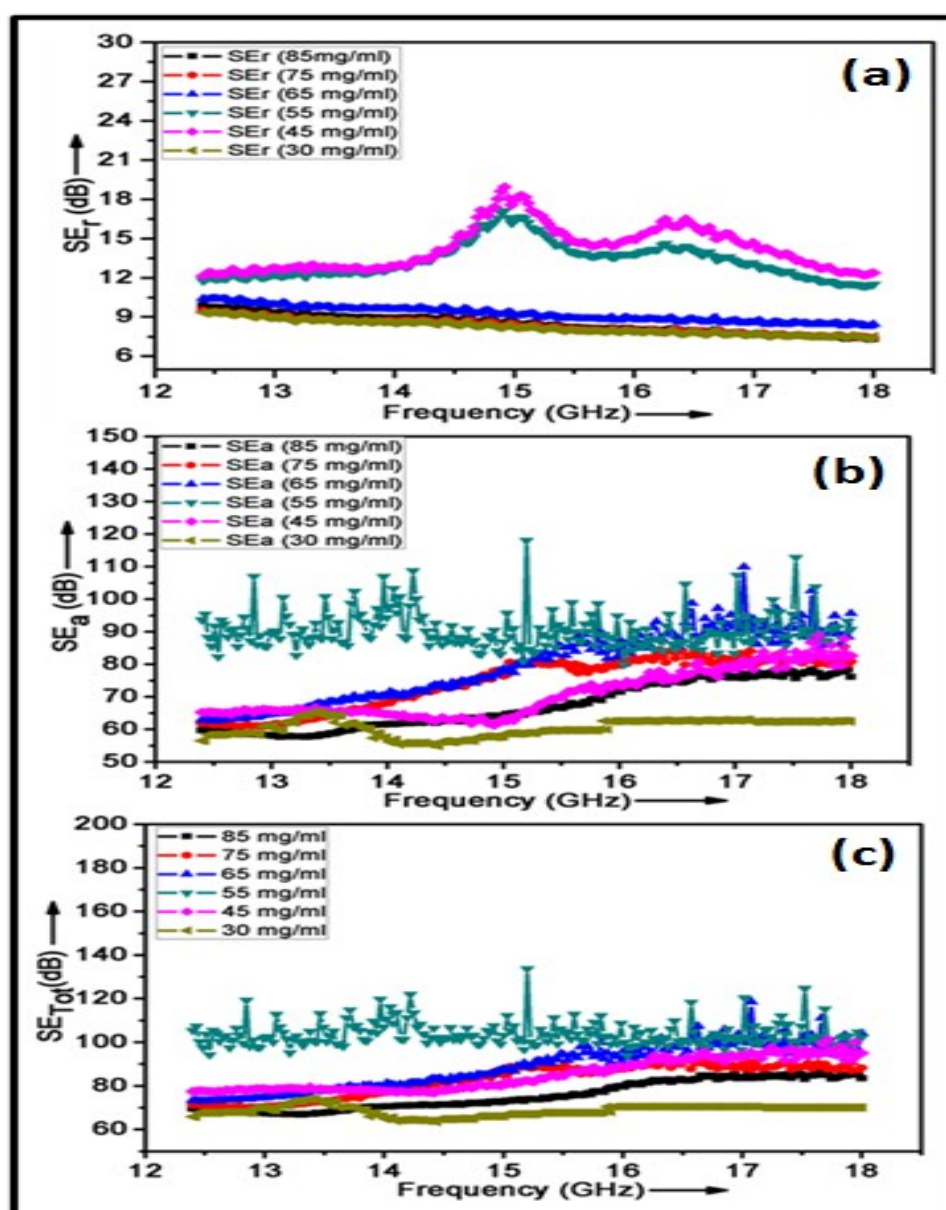

**Fig. S1** Variation of shielding effectiveness a)  $SE_A$ , b)  $SE_R$  & c)  $SE_{Total}$  of cylinder consist of CNTs with frequency in 12.4-18.0 GHz.

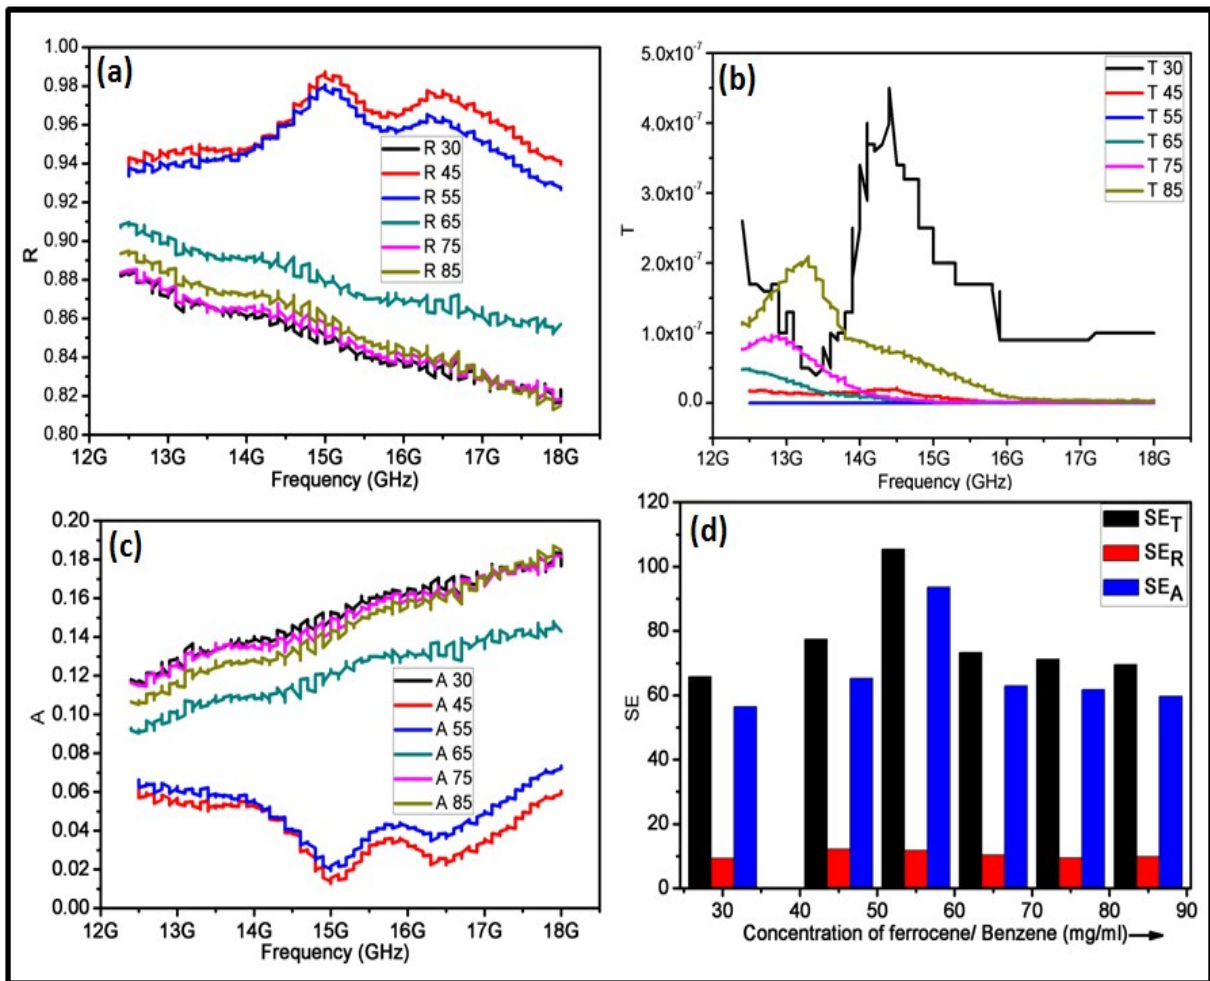

**Fig. S2** Variation of a) Refection (R), b) Transmission (T) and c) Absorption (A) coefficients of cylinder comprised of CNTs with frequency in 12.4-18.0 GHz and d) is the variation of shielding effectiveness  $SE_A$ ,  $SE_R$  &  $SE_T$  of the CNTs synthesized by using different concentrations of ferrocene/benzene 30, 45, 55, 65, 75 and 85 mg/ml at fixed frequency 12.4 GHz.
